# Supplementary material for: ‘The mirror of the soul?’ Inferring sadness in the eyes
Source: PubMed Central journal article supplement (PMC11362606; doi:10.1038/s41598-024-68178-0), 2024-08-29
Supplement: 41598_2024_68178_MOESM1_ESM.pdf [file 41598_2024_68178_MOESM1_ESM.pdf]

# 'The mirror of the soul?' Inferring sadness in the eyes

Jonas Moosavi<sup>1</sup>, Annika Resch<sup>1</sup>, Alexander N. Sokolov<sup>1</sup>, Andreas J. Fallgatter<sup>1,2</sup>, Marina A. Pavlova<sup>1</sup>

<sup>1</sup> Social Neuroscience Unit, Department of Psychiatry and Psychotherapy, Tübingen Center for Mental Health (TüCMH), Medical School and University Hospital, Eberhard Karls University of Tübingen, Tübingen, Germany

<sup>2</sup> German Center for Mental Health (DZPG), Partner Site Tübingen, Germany

## Supplementary Material

Table S1. Recognition accuracy: group comparison

|           | Group 1     |      |              | Group 2     |      |              | Mann-Whitney <i>U</i> / <i>t</i> -test | <i>P</i> uncorr. | <i>P</i> corr. |
|-----------|-------------|------|--------------|-------------|------|--------------|----------------------------------------|------------------|----------------|
|           | Mean        | Mdn  | 95% CI       | Mean        | Mdn  | 95% CI       |                                        |                  |                |
| anger     | 0.71 ± 0.15 |      |              | 0.78 ± 0.10 | 0.83 | [0.75; 0.82] | <i>U</i> = 257                         | 0.047**          | 0.094*         |
| happiness | 0.84 ± 0.14 | 0.89 | [0.79; 0.89] | 0.88 ± 0.13 | 0.89 | [0.83; 0.93] | <i>U</i> = 282                         | 0.165            | 0.198          |
| neutral   | 0.96 ± 0.08 | 1.00 | [0.93; 0.99] | 0.97 ± 0.08 | 1.00 | [0.94; 1.00] | <i>U</i> = 340                         | 0.555            | 0.555          |
| sadness   | 0.69 ± 0.19 |      |              | 0.83 ± 0.16 | 0.89 | [0.77; 0.89] | <i>U</i> = 201                         | 0.003**          | 0.018**        |
| fear      | 0.94 ± 0.07 | 0.94 | [0.91; 0.96] | 0.97 ± 0.05 | 1.00 | [0.95; 0.99] | <i>U</i> = 269                         | 0.075*           | 0.112          |
| disgust   | 0.56 ± 0.17 |      |              | 0.65 ± 0.16 |      |              | <i>t</i> (53) = 2.09                   | 0.041**          | 0.094*         |

**Table S2. Recognition accuracy for male and female posers**

|                  | female faces |      |              | male faces  |      |              | Wilcoxon signed-rank test,<br>z | P corr.   |
|------------------|--------------|------|--------------|-------------|------|--------------|---------------------------------|-----------|
|                  | Mean         | Mdn  | 95% CI       | Mean        | Mdn  | 95% CI       |                                 |           |
| <b>anger</b>     | 0.79 ± 0.16  | 0.78 | [0.75; 0.83] | 0.71 ± 0.17 | 0.78 | [0.67; 0.76] | 2.48                            | 0.028**   |
| <b>happiness</b> | 0.83 ± 0.18  | 0.89 | [0.78; 0.88] | 0.89 ± 0.16 | 0.89 | [0.84; 0.93] | 1.95                            | 0.077*    |
| <b>neutral</b>   | 0.95 ± 0.10  | 1.00 | [0.93; 0.98] | 0.98 ± 0.07 | 1.00 | [0.96; 1.00] | 1.54                            | 0.149     |
| <b>sadness</b>   | 0.83 ± 0.18  | 0.89 | [0.78; 0.88] | 0.70 ± 0.26 | 0.78 | [0.62; 0.77] | 3.45                            | 0.003**   |
| <b>fear</b>      | 0.95 ± 0.08  | 1.00 | [0.93; 0.98] | 0.95 ± 0.09 | 1.00 | [0.93; 0.98] | 0.23                            | 0.818     |
| <b>disgust</b>   | 0.50 ± 0.22  |      |              | 0.71 ± 0.23 | 0.78 | [0.64; 0.77] | 4.40                            | < 0.001** |

*Note:* For non-normally distributed data, additionally to means and SDs, Mdns and 95% CIs are reported. Double asterisks indicate significant differences ( $p < 0.05$ ), single asterisks indicate a tendency ( $0.05 < p < 0.1$ ).
